# Supplementary material for: A Pectic Polysaccharide from Codonopsis pilosula Alleviates Inflammatory Response and Oxidative Stress of Aging Mice via Modulating Intestinal Microbiota-Related Gut–Liver Axis
Source: MDPI journal article supplement (doi:10.3390/antiox12091781), 2023-09-19
Supplement: s1 [file s1]

## Supplementary

# A Pectic Polysaccharide from *Codonopsis pilosula* Alleviates Inflammatory Response and Oxidative Stress of Aging Mice via Modulating Intestinal Microbiota-Related Gut–Liver Axis

Yuanfeng Zou <sup>1,\*</sup>, Hong Yan <sup>1,†</sup>, Cenyu Li <sup>1</sup>, Fang Wen <sup>1</sup>, Xiaoping Jize <sup>1</sup>, Chaowen Zhang <sup>1</sup>, Siqu Liu <sup>1</sup>, Yuzhe Zhao <sup>1</sup>, Yuping Fu <sup>1</sup>, Lixia Li <sup>1</sup>, Fan Liu <sup>2</sup>, Ji Chen <sup>2</sup>, Rui Li <sup>2</sup>, Xingfu Chen <sup>2</sup> and Mengliang Tian <sup>2,\*</sup>

<sup>1</sup> Natural Medicine Research Center, College of Veterinary Medicine, Sichuan Agricultural University, Chengdu 611130, China

<sup>2</sup> College of Agronomy, Sichuan Agricultural University, Chengdu 611130, China

\* Correspondence: yuanfengzou@sicau.edu.cn (Y.Z.); secondat@sicau.edu.cn (M.T.)

<sup>†</sup> These authors contributed equally to this work.

**Table S1. The determination of anti-oxidative effect of CPP-1 during aging process in mice.**

|        | Lot number | Principal                                                                                                                                                                                                                                           | Wave length |
|--------|------------|-----------------------------------------------------------------------------------------------------------------------------------------------------------------------------------------------------------------------------------------------------|-------------|
| SOD    | A001-3-2   | Xanthine and xanthine oxidase reaction system could produce superoxide anion ( $O_2^-$ ), SOD can converse $O_2^-$ to $H_2O_2$ and $O_2$ . Meanwhile, WST-1 could react with $O_2^-$ and generate water-soluble yellow filth.                       | 450 nm      |
| T-AOC  | A015-2-1   | ABTS is oxidized to green $ABTS^+$ by appropriate oxidants in body. The antioxidants could inhibit the production of $ABTS^+$ . The T-AOC level of the sample can be determined by measuring the absorbance of $ABTS^+$ at 405 nm or 734 nm.        | 405 nm      |
| MDA    | A003-1-2   | MDA could react with TBA and produce red complex.                                                                                                                                                                                                   | 523 nm      |
| GSH-PX | A005-1-2   | GSH-PX could promote the reaction of $H_2O_2$ with GSH to form $H_2O$ and GSSG, the activity of GSH-PX can be evaluated by the rate of enzymatic reaction. GSH could react with dinitrobenzoic acid and converse to colored product TNBA at 412 nm. | 412 nm      |
| CAT    | A007-1-1   | The progress of CAT catalyzing $H_2O_2$ could be suspended by ammonium molybdate. The residual $H_2O_2$ could react with ammonium molybdate and produce yellow substance.                                                                           | 405 nm      |
